# Supplementary material for: Functional dissection of the ash2 and ash1 transcriptomes provides insights into the transcriptional basis of wing phenotypes and reveals conserved protein interactions
Source: Springer Nature journal article supplement (doi:10.1186/gb-2007-8-4-r67), 2007-04-28
Supplement: Additional file 1 [file gb-2007-8-4-r67-s1.pdf]

| <b>Number of Unique Genes</b> | <b><i>ash2</i><sup>1</sup></b> | <b><i>ash2</i><sup>112411</sup></b> | <b><i>ash1</i><sup>22</sup></b> |
|-------------------------------|--------------------------------|-------------------------------------|---------------------------------|
| log <sub>2</sub> ratio > 1    | <b>179</b>                     | <b>272</b>                          | <b>59</b>                       |
| log <sub>2</sub> ratio <-1    | <b>178</b>                     | <b>174</b>                          | <b>22</b>                       |
| log <sub>2</sub> ratio > 0.58 | <b>426</b>                     | <b>782</b>                          | <b>194</b>                      |
| log <sub>2</sub> ratio <-0.58 | <b>526</b>                     | <b>939</b>                          | <b>115</b>                      |
