# Supplementary material for: Functional dissection of the ash2 and ash1 transcriptomes provides insights into the transcriptional basis of wing phenotypes and reveals conserved protein interactions
Source: Springer Nature journal article supplement (doi:10.1186/gb-2007-8-4-r67), 2007-04-28
Supplement: Additional file 21 [file gb-2007-8-4-r67-s21.pdf]

| GO TERM                                             | Downregulated Sets       |                               |                           | Upregulated Sets         |                               |                           |
|-----------------------------------------------------|--------------------------|-------------------------------|---------------------------|--------------------------|-------------------------------|---------------------------|
|                                                     | <i>ash2</i> <sup>1</sup> | <i>ash2</i> <sup>112411</sup> | <i>ash1</i> <sup>22</sup> | <i>ash2</i> <sup>1</sup> | <i>ash2</i> <sup>112411</sup> | <i>ash1</i> <sup>22</sup> |
| Development                                         | 2.51E-16                 | 1.57E-21                      | 2.40E-04                  | 8.18E-01                 | 1.00E+00                      | 8.25E-01                  |
| Organ development                                   | 3.21E-10                 | 1.45E-11                      | 1.19E-01                  | 5.63E-01                 | 1.00E+00                      | 9.67E-01                  |
| Wing disc development                               | 7.98E-04                 | 2.44E-05                      | 3.01E-01                  | 9.04E-01                 | 1.00E+00                      | none                      |
| Dorsal/ventral pattern formation, imaginal disc     | 1.99E-01                 | 2.79E-01                      | 1.26E-01                  | 6.93E-01                 | none                          | none                      |
| Anterior/posterior pattern formation, imaginal disc | 4.93E-02                 | 1.09E-01                      | none                      | none                     | none                          | none                      |
| Death                                               | 2.06E-04                 | 5.37E-03                      | 3.01E-01                  | 3.64E-01                 | 1.00E+00                      | 8.65E-01                  |
| Regulation of growth                                | 1.49E-02                 | 1.23E-02                      | 6.73E-02                  | 8.30E-01                 | 1.00E+00                      | 8.95E-01                  |
| Mitochondrion                                       | 1.00E+00                 | 1.00E+00                      | 9.25E-01                  | 4.16E-04                 | 2.45E-05                      | 3.82E-01                  |
| Mitochondrial ribosome                              | none                     | none                          | none                      | 1.38E-02                 | 1.99E-05                      | 3.50E-01                  |

|  |                             |
|--|-----------------------------|
|  | FDR adjusted P value < 0.01 |
|  | FDR adjusted P value < 0.05 |
