# Supplementary material for: Functional dissection of the ash2 and ash1 transcriptomes provides insights into the transcriptional basis of wing phenotypes and reveals conserved protein interactions
Source: PubMed Central journal article supplement (PMC1896016; doi:10.1186/gb-2007-8-4-r67), 2007-04-28
Supplement: gb-2007-8-4-r67-S18.pdf [file gb-2007-8-4-r67-S18.pdf]

| Wing Disc  |         |
|------------|---------|
| ash2       | ash1    |
| ap         | ap      |
| CG15093    |         |
| CG17032    |         |
| CG4382     |         |
| CG4766     | CG4766  |
| CG4914     |         |
| CG5392     |         |
| CG6044     |         |
| CG6680     |         |
| CG7160     |         |
| CG8502     |         |
| CG9266     |         |
| CG9307     |         |
| CG9427     |         |
| Doc1       |         |
| Doc2       |         |
| Doc3       |         |
| kn         | kn      |
| msh, Dr    | msh, Dr |
| NetA       |         |
| pdm2       | pdm2    |
| rost       |         |
| rpk        |         |
| toe        |         |
| vg         |         |
| CAH1       |         |
| CG10570    |         |
| CG10962    |         |
| CG5397     |         |
| Edg91      |         |
| GV1        |         |
| Phk-3      |         |
| regucalcin |         |
| rpr        |         |
| sda        |         |

| Wing-Hinge    |         |
|---------------|---------|
| ash2          | ash1    |
| ana           | ana     |
| BcDNA:SD04019 |         |
| CG14301       |         |
| CG16868       |         |
| CG32029       |         |
| CG6234        | CG6234  |
| CG7160        |         |
| CG9057        | CG9057  |
| Cyp310a1      |         |
| Dll           | Dll     |
| Doc1          |         |
| Doc2          |         |
| dve           |         |
| ed            |         |
| en            |         |
| hh            |         |
| inv           |         |
| kn            | kn      |
| NetA          |         |
| opa           |         |
| pdm2          | pdm2    |
| Poxn          |         |
| vg            |         |
| wgn           |         |
| Gasp          | Gasp    |
| pip           |         |
| Ugt86Di       | Ugt86Di |
| vvl           |         |

| Body Wall     |            |
|---------------|------------|
| ash2          | ash1       |
| Ance          |            |
| CG13023       |            |
| CG13053       | CG13053    |
| CG15786       |            |
| CG31640       |            |
| CG3770        |            |
| CG6199        |            |
| CG7860        | CG7860     |
| Fas2          |            |
| ImpL2         | ImpL2      |
| Obp99a        | Obp99a     |
| ss            |            |
| toe           |            |
|               | eyg        |
|               | Sox102F    |
| Act57B        | Act57B     |
| apt           |            |
| BcDNA:GH07269 |            |
| CG10126       |            |
| CG11370       |            |
| CG12481       |            |
| CG12505       |            |
| CG13044       |            |
| CG15353       |            |
| CG1572        | CG1572     |
| CG16820       |            |
| CG3244        |            |
| CG3624        |            |
| CG4386        | CG4386     |
| CG5397        | CG5397     |
| CG6921        | CG6921     |
| CG9192        |            |
| CG9338        | CG9338     |
| CG9358        |            |
| eiger         |            |
| Gs2           | Gs2        |
| Obp56a        |            |
| regucalcin    | regucalcin |
| Traf1         |            |
| trol          |            |
| wun2          |            |
|               | CG10200    |
