# Supplementary material for: Functional dissection of the ash2 and ash1 transcriptomes provides insights into the transcriptional basis of wing phenotypes and reveals conserved protein interactions
Source: PubMed Central journal article supplement (PMC1896016; doi:10.1186/gb-2007-8-4-r67), 2007-04-28
Supplement: gb-2007-8-4-r67-S20.pdf [file gb-2007-8-4-r67-S20.pdf]

| Sin3A Up      |         |
|---------------|---------|
| ash2          | ash1    |
| Ahcy13        |         |
| Ate1          |         |
| BcDNA:LD32788 |         |
| bcn92         |         |
| betaggt-II    |         |
| CG10195       |         |
| CG10268       |         |
| CG10306       |         |
| CG10460       |         |
| CG10638       |         |
| CG1140        |         |
| CG11722       |         |
| CG11897       |         |
| CG12264       |         |
| CG12379       |         |
| CG12505       |         |
| CG12876       |         |
| CG12954       |         |
| CG13533       |         |
| CG13623       |         |
| CG13645       |         |
| CG13941       |         |
| CG14270       | CG14270 |
| CG14483       |         |
| CG14696       |         |
| CG14907       |         |
| CG15784       | CG15784 |
| CG15863       |         |
| CG15908       |         |
| CG17266       |         |
| CG17327       |         |
| CG17530       |         |
| CG17531       |         |
| CG17734       |         |
| CG17904       |         |
| CG18522       |         |
| CG18547       |         |
| CG18596       |         |
| CG1882        |         |
| CG2064        |         |
| CG2246        |         |
| CG2789        | CG2789  |
| CG2846        |         |
| CG2909        |         |
| CG30152       |         |
| CG30493       |         |
| CG31063       |         |
| CG31793       |         |
| CG32549       |         |
| CG3271        |         |
| CG33066       |         |
| CG3397        |         |
| CG3448        |         |
| CG3931        |         |
| CG4769        |         |
| CG4858        |         |
| CG5044        |         |
| CG5224        | CG5224  |
| CG5989        |         |

|                      |        |
|----------------------|--------|
| CG6272               |        |
| CG6335               |        |
| CG6353               |        |
| CG6512               |        |
| CG7506               |        |
| CG7627               |        |
| CG7842               |        |
| CG8198               |        |
| CG8360               |        |
| CG8778               |        |
| CG9034               |        |
| CG9646               |        |
| CG9836               |        |
| Chmp1                |        |
| Cys                  | Cys    |
| Dgp-1                |        |
| dynactin-subunit-p25 |        |
| GstE1                | GstE1  |
| Hmgs                 |        |
| Ide                  |        |
| Jafrac1              |        |
| Jhl-1                |        |
| Jhl-26               |        |
| l(3)02640            |        |
| Mocs1                |        |
| mRpL11               |        |
| mRpL21               | mRpL21 |
| mRpL22               |        |
| mRpL22-24            |        |
| mRpS18a              |        |
| mRpS32               |        |
| mRpS33               |        |
| mus205               |        |
| Prx6005              |        |
| Rep                  |        |
| Sras                 |        |
| TepIV                |        |
| Thor                 | Thor   |
| Tim10                |        |
| TMS1                 |        |
| Ugt86Da              |        |
| Vha36                | Vha36  |
| bsf                  |        |
| Cat                  |        |
| CG17184              |        |
| CG1969               | CG1969 |
| CG33138              |        |
| CG7611               |        |
| CG7739               |        |
| CG9186               | CG9186 |
| Eno                  |        |
| Gapdh1               |        |
| Gapdh2               |        |
| ldh                  |        |
| NTPase               |        |
| Thiolase             |        |
| Tpi                  |        |
| Trxr-1               |        |
| Vha44                |        |

| Sin3A Down |      |
|------------|------|
| ash2       | ash1 |
| ApepP      |      |
| CG11120    |      |
| CG1544     |      |
| CG1998     |      |
| CG33214    |      |
| CG9471     |      |
| HmgZ       |      |
| Mgstl      |      |
| Pepck      |      |
| Taf6L      |      |
| Ts         |      |
| CG10912    |      |
| Karl       |      |
| Mlc2       | Mlc2 |
